# Supplementary material for: Effects of Different Freezing Rate and Frozen Storage Temperature on the Quality of Large-Mouth Bass (Micropterus salmoides)
Source: MDPI journal article supplement (doi:10.3390/molecules28145432), 2023-07-15
Supplement: s1 [file s1]

## Supplementary Materials

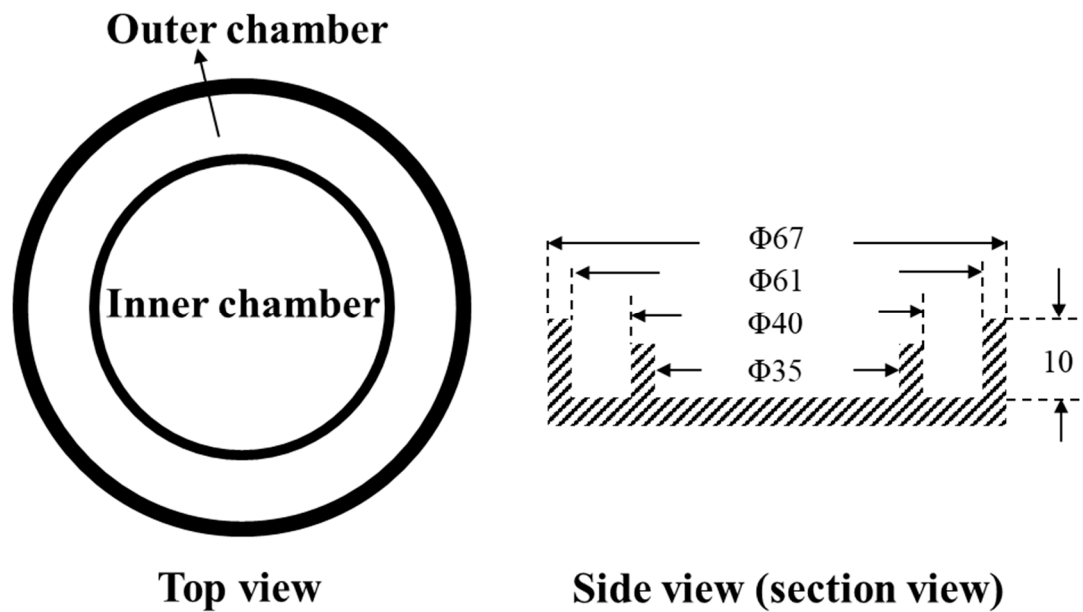

Supplementary Figure S1. Illustration of the micro-diffusion dish.

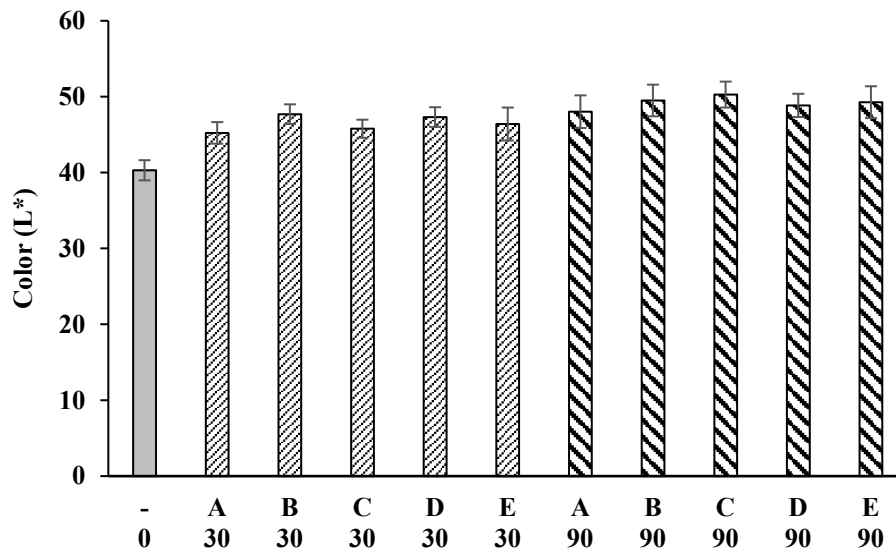

Supplementary Figure S2. Lightness ( $L^*$ ) of large-mouth fillet subjected to different freezing/frozen storage treatments. “-”, fresh sample; Group A, Freeze at  $-18\text{ }^{\circ}\text{C}$  and storage at  $-18\text{ }^{\circ}\text{C}$ ; Group B, Freeze at  $-60\text{ }^{\circ}\text{C}$  and storage at  $-18\text{ }^{\circ}\text{C}$ ; Group C, Freeze at  $-60\text{ }^{\circ}\text{C}$  with forced air circulation (wind speed  $2\text{ m/s}$ ) and storage at  $-18\text{ }^{\circ}\text{C}$ ; Group D, Freeze at  $-60\text{ }^{\circ}\text{C}$  and storage at  $-40\text{ }^{\circ}\text{C}$ ; Group E, Freeze at  $-60\text{ }^{\circ}\text{C}$  and storage at  $-60\text{ }^{\circ}\text{C}$ .
