# Supplementary material for: Effects of Different Freezing Rate and Frozen Storage Temperature on the Quality of Large-Mouth Bass (Micropterus salmoides)
Source: Molecules. 2023 Jul 15;28(14):5432. doi: 10.3390/molecules28145432 (PMC10385098; doi:10.3390/molecules28145432)
Supplement: Supplementary file 1 [file molecules-28-05432-s001.zip › Supplementary File S2.xlsx]

## Sheet: Summary of quantified volatiles
		Hexanoic acid (CAS)	Heptanoic acid	Pentadecanal-	Octanoic acid (CAS)	2-Propenal, 3-phenyl- (CAS)	Nonanoic acid	n-Decanoic acid	Heptanal (CAS)	2-Hexenal, (E)- (CAS)	2-Pentanone (CAS)	1-Pentanol (CAS)	1-Heptadecanol (CAS)	2-Butanone, 3-methyl- (CAS)	2-Butanone, 3-hydroxy- (CAS)	Octanal	2,3-Octanedione (CAS)	5-Hepten-2-one, 6-methyl-	1-Hexanol (CAS)	3-Heptanol, 6-methyl- (CAS) or 3-octanol	2-Nonanone (CAS)	NONANAL	2-Octenal, (E)- (CAS)	1-Octen-3-ol (CAS)	1-HEPTANOL	DECANAL	2,4-Heptadienal, (E,E)- (CAS)	(5Z)-Octa-1,5-dien-3-ol	4-Hepten-1-ol	1-Hexanol, 2-ethyl- (CAS)	2-Nonenal, (E)-	1-Octanol	2,7-Octadien-1-ol	Undecanal	3-Undecanone (CAS)	2-Undecanone (CAS)	2-Octen-1-ol, (Z)- (CAS)	2-Undecanone (CAS)	1-Nonanol (CAS)	11-Dodecenol	2(5H)-furanone
FRESH	Note: Only compounds that presented in at least 3 replicates were considered as reliable, and subsequently quantified. The quantification was done based on peak area comparision against internal standard, see the manuscript text for more details. The others were treated as 0 concentration.	0	0	0	0.128519	0.0722653	0.556758	4.56583	0	0	0	0	0	0.96421	0	4.31933	0.356364	0.158817	3.73434	0	0	21.5906	0	2.89994	0	0	0	0	0	3.00196	0	3.89557	0	0	0	0	0	0	5.03066	0.0737553	0
FRESH		0	0	0	0.423403	2.31628	0.0833876	0.0797597	0	0	0	0	0	1.70714	0	1.71245	0.151313	0.754284	0.674783	0	0	13.8989	0	0.69736	0	0	0	0	0	1.33698	0	5.32549	0	0	0	0	0	0	16.2379	0.151589	0
FRESH		0	0	0	7.33242	0.819464	0.215834	0.321331	0	0	0	0	0	2.67293	0	10.3205	0.247252	1.67697	2.21354	0	0	68.9076	0	2.15004	0	0	0	0	0	3.29669	0	17.1609	0	0	0	0	0	0	19.0369	0.242047	0
30D-18-18		1.83689	1.47049	0.161368	0.658674	0.212211	0.743334	1.53912	0	0	0	0	0	0.659484	0	0.813292	0.222034	0.613344	1.17925	0	0.149976	8.70864	0	2.30586	0	0	0	0	0	2.69221	0.429552	7.29058	0	0	0.0383825	0.463486	0	0	2.05486	0	0.145333
30D-18-18		7.14124	0.557565	0.170497	4.6848	0.152022	0.805093	1.28405	0	0	0	0	0	1.56972	0	1.4285	0.390701	0.524366	1.22848	0	0.133291	15.6791	0	1.38621	0	0	0	0	0	6.45724	0.242642	3.95639	0	0	0.161978	0.263064	0	0	10.7358	0	0.169853
30D-18-18		21.8814	0.183823	0.332604	2.92439	0.656952	0.463637	0.447683	0	0	0	0	0	1.91439	0	4.31033	0.106975	2.24079	5.36273	0	0.426579	6.50411	0	0.960926	0	0	0	0	0	3.53066	0.114627	3.08051	0	0	0.121209	0.173125	0	0	5.42749	0	0.0593905
30D-18-18		45.8784	18.8086	1.25468	83.8878	0.173684	4.86921	57.4116	0	0	0	0	0	2.42793	0	0.869154	0.427222	0.816055	3.73207	0	0.205545	43.9844	0	1.01859	0	0	0	0	0	2.23054	0.388751	19.9522	0	0	0.276175	0.151256	0	0	2.18359	0	1.38987
30D-60-18		1.0083	0.668244	0.251412	1.47786	0.167165	2.51304	3.54544	0	0	0	0	0	0	0	0	1.22576	0.232054	1.97594	0.0883929	0.296702	15.8697	0.415019	3.61867	0.63989	0	0	0	0	2.96922	0.438757	11.6684	0	0	0	0.321845	0.660894	0	4.39755	0.215096	0.0505425
30D-60-18		5.7072	0.500334	0.260007	1.38133	0.106824	0.374239	0.446865	0	0	0	0	0	0	0	0	0.364887	0.703696	6.98111	0.142535	0.198139	3.96969	0.865846	1.72604	3.38508	0	0	0	0	1.21205	0.520377	5.82272	0	0	0	0.106989	0.102862	0	2.52331	0.0676929	0.187797
30D-60-18		8.83112	0.0787442	0.0601026	0.374965	0.0284343	0.931999	0.571773	0	0	0	0	0	0	0	0	1.8711	0.375614	6.15578	0.184428	0.108861	11.8093	0.20537	3.03355	2.45943	0	0	0	0	2.07875	0.0981597	5.1279	0	0	0	0.211593	0.458798	0	3.02033	0.0550306	0.0990745
30D-60-18		43.4635	10.4957	0.0564049	19.9794	0.159088	0.160486	0.153975	0	0	0	0	0	0	0	0	0.63201	0.192315	6.69111	0.0546432	0.105897	14.6064	0.0925734	5.60916	4.14129	0	0	0	0	0.928305	0.212816	1.6871	0	0	0	0.419386	1.42029	0	0.954648	0.147778	0.037495
30D-60(2)-18		5.12841	1.89221	0	4.86886	0.411321	1.73979	1.9043	0	0	0	0	0	0	0.983047	5.0018	0	2.36238	0.261763	0	0.231782	43.0068	0	1.37177	0	0	0	0	0	3.46748	0	2.81226	0	0	0	0	3.39181	0	3.19136	0	0.108756
30D-60(2)-18		7.82513	0.514885	0	1.2973	0.0535501	1.16896	1.62058	0	0	0	0	0	0	5.58482	1.32793	0	0.67785	0.357406	0	0.671726	5.86145	0	2.32503	0	0	0	0	0	4.77918	0	7.25724	0	0	0	0	0.925023	0	7.5094	0	0.165293
30D-60(2)-18		30.2713	0.533621	0	2.12826	0.30338	0.765467	0.631989	0	0	0	0	0	0	0.317046	3.45765	0	2.89166	0.407972	0	0.26262	13.4042	0	1.22554	0	0	0	0	0	3.29346	0	18.1232	0	0	0	0	0.977736	0	1.23025	0	0.0730527
30D-60(2)-18		38.1116	6.23322	0	10.6623	0.0893089	1.6326	1.1193	0	0	0	0	0	0	0.811362	0.654622	0	0.415006	0.418615	0	0.42181	31.9893	0	3.1097	0	0	0	0	0	6.38145	0	8.71533	0	0	0	0	8.99188	0	2.98878	0	0.195734
30D-60-40		18.2333	0.837479	0	1.45929	0.245823	3.16752	3.23192	0	0	0	0	0	0	0	0.733238	0.285029	1.47473	0.14858	0.256417	0.400483	0	0	0	0	0	0	0	0	5.89361	0.718687	20.9116	0	0	0	0.342354	0	0	8.41328	0	0.274783
30D-60-40		5.45408	0.505075	0	6.9839	0.139009	0.713597	0.901669	0	0	0	0	0	0	0	0.739439	1.04459	0.823405	1.3335	0.116851	0.157198	9.23057	0	0	0	0	0	0	0	2.25244	0.123127	3.50286	0	0	0	0.209597	0	0	3.02276	0	0.0932893
30D-60-40		13.6738	1.68843	0	17.1351	0.165517	1.08669	0.868047	0	0	0	0	0	0	0	20.9955	0.269231	0.309166	1.15852	0.137354	2.33448	7.14038	0	0	0	0	0	0	0	3.67757	0.163504	29.5393	0	0	0	0.472354	0	0	1.73096	0	0.065629
30D-60-40		71.4705	10.4283	0	2.17555	1.91508	3.24389	3.6463	0	0	0	0	0	0	0	9.37187	1.66375	5.5458	9.79094	1.63831	0.255066	0	0	0	0	0	0	0	0	26.7601	2.66657	5.15978	0	0	0	2.28923	0	0	14.9105	0	0.806701
30D-60-60		29.6025	0.659635	0	1.3251	0.0851303	2.37778	2.50639	0	0	0	0	0	1.10862	4.15653	2.77222	0.855076	0	0.573086	0.201802	0.401183	33.9129	0.283601	2.09691	0	1.24942	0	0	0	7.22565	0	17.459	0	0	0	0	0	0.510323	14.4796	0	0.314913
30D-60-60		24.0821	1.71099	0	4.72712	0.246965	0.481178	0.430667	0	0	0	0	0	3.80703	30.2424	0.95692	0.109963	0	0.118959	1.66944	0.133614	11.0968	1.95382	0.573571	0	0.50998	0	0	0	2.58666	0	3.80897	0	0	0	0	0	0.235437	3.51229	0	0.0939865
30D-60-60		10.9008	1.99917	0	8.48768	0.084724	2.54302	2.61596	0	0	0	0	0	7.1749	3.64535	6.9053	1.2333	0	1.97392	0.322087	4.70163	54.8536	0.565136	3.43844	0	2.32943	0	0	0	11.7596	0	15.5969	0	0	0	0	0	1.01795	12.4653	0	0.699893
30D-60-60		82.5514	7.74203	0	12.5786	2.88111	4.27128	4.35187	0	0	0	0	0	12.0491	41.8505	24.7256	3.42281	0	0.669562	0.0692983	0	274.935	0.0433956	18.7873	0	7.60588	0	0	0	56.8531	0	69.9278	0	0	0	0	0	3.7756	40.7536	0	4.16442
90D-18-18		0	0	0	6.34457	0.117582	1.92957	1.35922	0	0	1.60672	0.117046	0	0	0	3.15454	0.480416	0.562388	4.18542	0	0	18.3189	0.174717	2.05716	0	0	0	0	0	2.77645	0.429229	7.07058	0	0	0	0	0	0	2.30507	0	0
90D-18-18		0	0	0	2.67658	0.11077	0.827218	0.954074	0	0	2.62761	0.2429	0	0	0	1.75044	0.60863	1.58673	4.51799	0	0	13.9107	0.194672	4.59742	0	0	0	0	0	4.07561	0.246817	8.18607	0	0	0	0	0	0	4.17589	0	0
90D-18-18		0	0	0	1.12894	0.189894	0.761946	0.536497	0	0	3.07829	0.248033	0	0	0	1.95152	0.544446	1.32208	2.76448	0	0	19.3598	0.245545	3.203	0	0	0	0	0	2.37793	0.511834	4.43194	0	0	0	0	0	0	2.66821	0	0
90D-18-18		0	0	0	0.372199	0.717907	0.139077	0.26502	0	0	3.30593	0.0793403	0	0	0	1.99731	0.567691	0.846134	5.77604	0	0	26.075	0.308022	2.23912	0	0	0	0	0	3.5513	0.198163	5.82156	0	0	0	0	0	0	3.45312	0	0
90D-60-18		0	0	0	1.25208	0.0576499	0.547475	0.0795369	0.330294	0.100378	0	1.55214	0	0	0	3.94215	5.71071	0.479716	26.4303	0.822476	0.398113	8.19147	0.379886	11.005	8.35632	0	0.300015	5.15781	0.187477	0	0.262046	6.33143	3.23072	0.389488	0	0.566779	1.39922	0	0	0	0
90D-60-18		0	0	0	0.662582	0.0932886	0.291492	0.653773	2.75389	0.235278	0	1.28744	0	0	0	2.1384	6.8822	4.19146	20.6522	0.781562	0.282271	13.0185	0.683392	11.333	8.44907	0	0.135554	5.66547	0.167912	0	0.449376	7.06998	5.19671	0.301729	0	0.560096	2.27199	0	0	0	0
90D-60-18		0	0	0	0.148319	0.315358	0.428083	0.430564	1.42204	0.184723	0	1.9105	0	0	0	2.44796	8.66892	1.2732	21.286	0.426233	0.313647	9.41589	0.458355	13.8101	10.4932	0	0.182586	6.26475	0.253922	0	0.421529	5.14555	3.22586	0.551835	0	0.619185	1.57041	0	0	0	0
90D-60-18		0	0	0	2.89863	0.214327	0.0490694	0.262784	2.19204	0.184584	0	1.37607	0	0	0	4.75834	5.62896	0.650101	21.0336	0.107219	0.348222	17.0408	0.699225	13.091	11.7313	0	0.233847	5.50815	0.265999	0	0.373918	8.11347	4.65896	0	0	0.396069	2.02842	0	0	0	0
90D-60(2)-18		0	0	0	4.98843	0.0747389	1.46231	1.80023	0	0	0	1.31536	0	0	0	6.64635	17.8407	1.12301	6.57682	0.236104	0	29.5795	0.308272	3.69698	7.59658	0	0	1.36177	0	4.73123	1.10385	22.2563	0	0	0	0.409363	4.73341	0	8.21794	0	0
90D-60(2)-18		0	0	0	0.751577	0.243313	0.51912	0.433708	0	0	0	0.40664	0	0	0	1.72682	1.27923	1.03635	36.5648	0.0624269	0	20.4946	1.12309	5.20467	3.58362	0	0	10.3646	0	1.60673	0.499026	5.36202	0	0	0	1.51794	0.606755	0	3.70884	0	0
90D-60(2)-18		0	0	0	0.17567	0.187118	0.0679298	0.15589	0	0	0	1.00999	0	0	0	3.40125	3.02988	0.399951	17.6494	0.113553	0	12.7016	0.32178	27.2382	18.9941	0	0	3.78078	0	1.47736	0.350785	7.91055	0	0	0	0.329904	0.549969	0	4.18744	0	0
90D-60-40		0.0890314	0	0	1.81052	0.549747	0	0	0	0	0	0	0	0	0.727965	0	0.405598	0	0.598282	1.27773	0.123595	8.47852	0.26235	1.52456	0	0	0	0	0	2.34631	0	4.18337	0	0	0	0	0	0	1.72033	0	0
90D-60-40		3.58269	0	0	1.06941	0.159523	0	0	0	0	0	0	0	0	0.706998	0	0.963777	0	1.57166	0.923543	0.237531	21.9743	0.108809	1.6599	0	0	0	0	0	3.40906	0	3.65499	0	0	0	0	0	0	2.5591	0	0
90D-60-40		7.77207	0	0	0.175815	0.0831989	0	0	0	0	0	0	0	0	0.659034	0	0.382619	0	2.80486	0.752871	0.255218	6.96638	0.174939	2.78441	0	0	0	0	0	3.68206	0	9.80973	0	0	0	0	0	0	8.70259	0	0
90D-60-40		26.4285	0	0	3.90621	0.0611087	0	0	0	0	0	0	0	0	1.48663	0	1.7095	0	4.77118	0.416098	0.197868	16.7414	0.383708	4.36586	0	0	0	0	0	2.31823	0	4.68383	0	0	0	0	0	0	3.35462	0	0
90D-60-60		0.100267	0	0	5.41503	0.426992	1.39847	0.163067	0	0	0.891521	0.24963	0.857131	0	0	1.7376	0	0	0	0	0	0	0	0	0	0	0	0	0	0	0	0	0	0	0	0	0	0	0	0	0
90D-60-60		1.88645	0	0	1.63226	0.0897137	0.0806988	1.70944	0	0	2.65583	0.0384257	1.25195	0	0	4.45147	0	0	0	0	0	0	0	0	0	0	0	0	0	0	0	0	0	0	0	0	0	0	0	0	0
90D-60-60		7.7505	0	0	0.683021	0.0947954	0.65652	0.672146	0	0	3.38356	0.22061	2.6204	0	0	1.32668	0	0	0	0	0	0	0	0	0	0	0	0	0	0	0	0	0	0	0	0	0	0	0	0	0
90D-60-60		27.4146	0	0	0.22705	0.241455	0.413308	0.543087	0	0	1.46775	0.107407	1.14567	0	0	1.69847	0	0	0	0	0	0	0	0	0	0	0	0	0	0	0	0	0	0	0	0	0	0	0	0	0
